# Supplementary material
Source: publisher figshare collection journal article supplement (https://acs.figshare.com/ndownloader/files/10483588)
Supplement: Supplementary file 1 [file 10483588]

# *Supporting Information*

## Multicolor photoluminescence of a hybrid film via dual-emitting strategy of inorganic fluorescent Au nanocluster and organic room-temperature phosphorescent copolymer

*Xi Wang, Yun Xu, Xiang Ma\* and He Tian\**

Key Laboratory for Advanced Materials and Institute of Fine Chemicals, School of Chemistry and Molecular Engineering, East China University of Science and Technology, Shanghai 200237, China.

E-mail: X. M., [maxiang@ecust.edu.cn](mailto:maxiang@ecust.edu.cn) & [tianhe@ecust.edu.cn](mailto:tianhe@ecust.edu.cn)

### **Contents:**

**Figure S1.** Preparation routine of poly-BrNpA.

**Figure S2.** The TEM spectra of AuNC@ histidine.

**Table S1.** The different mole proportions of triadic system, and calculated CIE coordinates from the PL spectra of the PVA composite films shown in Figure 2(c).

**Table S2.** Calculated CIE coordinates from the PL spectra changes under different humidity shown in Figure 2(e).

**Figure S3.** The excitation spectrum of poly-BrNpA,  $\lambda_{em}=580nm$ .

**Figure S4.** The absorption spectrum of poly-BrNpA/AuNC@histidine in different humidity.

**Table S3.** Hydrogen bonding between the components.

**Figure S5.** The luminescence photos of dual-emission films of different proportions, conditions as follows: aqueous solution under daily light, aqueous solution under  $\lambda=365$  nm UV irradiation, drying film under daily light, drying film under  $\lambda=365$  nm UV irradiation (from up to down).

**Figure S6.** The luminescence photos of dual-emission PAM films of different proportions.

**Figure S7.** The luminescence photos of dual-emission PVP films.

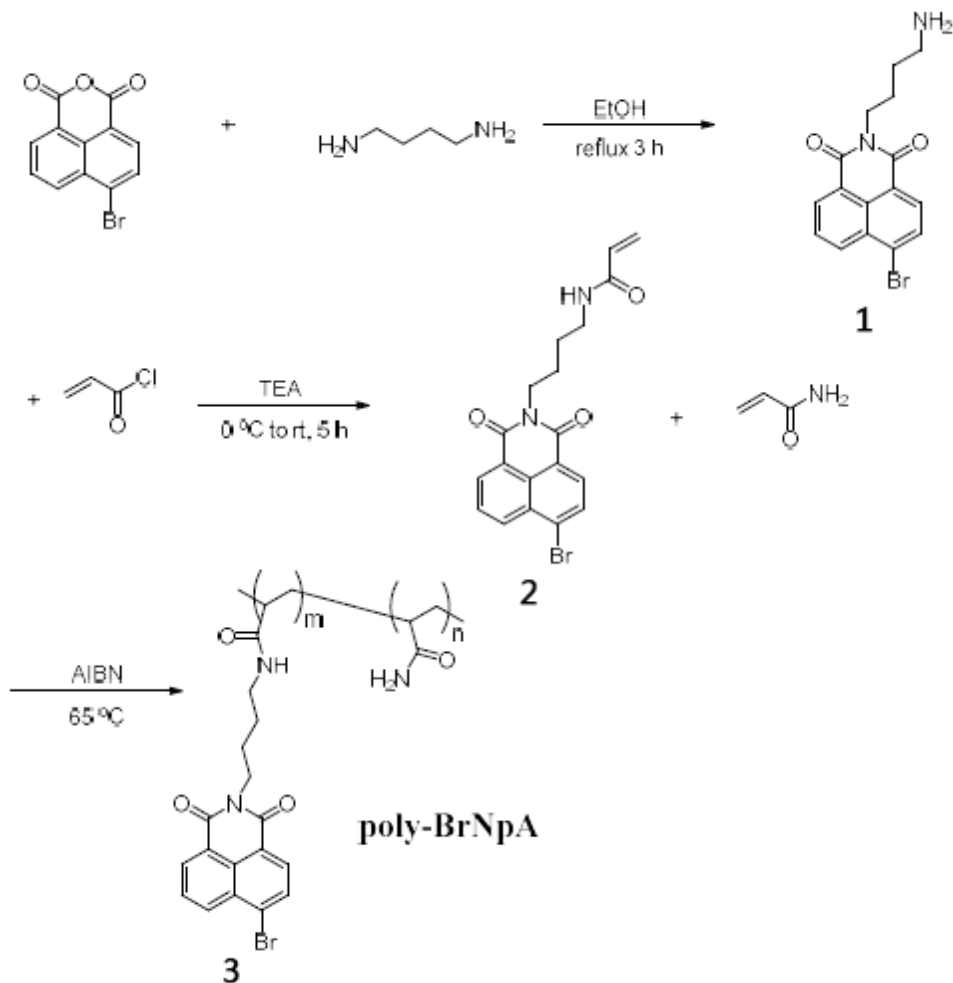

**Figure S1.** Preparation routine of poly- BrNpA.

**Synthesis of 2-(4-aminobutyl)-6-bromo-1H-benzo [de]isoquinoline-1,3(2H)-dione. (1)**  $^1\text{H}$  NMR (400 MHz,  $\text{D}_2\text{O}$ ,  $\delta$ ) 8.24 (d,  $J = 8.5$  Hz, 1H, Ar H), 8.19 (d,  $J = 7.4$  Hz, 1H, Ar H), 7.91 (d,  $J = 7.9$  Hz, 1H, Ar H),

7.82 (d, J = 7.9 Hz, 1H, Ar H), 7.64 (t, J = 7.9 Hz, 1H, Ar H), 3.97 (t, J = 6.5 Hz, 2H, CH<sub>2</sub>), 3.06 (t, J = 6.9 Hz, 2H, CH<sub>2</sub>), 1.81-1.66 (m, 4H, CH<sub>2</sub>). <sup>13</sup>C NMR (100 MHz, DMSO-d<sub>6</sub>, δ) 162.97, 162.92, 132.71, 131.67, 131.43, 131.05, 129.78, 129.25, 128.88, 128.25, 122.67, 121.89, 38.55, 24.71. HRMS (ESI) (m/z): [M+H]<sup>+</sup> calcd for [C<sub>16</sub>H<sub>16</sub>BrN<sub>2</sub>O<sub>2</sub>]<sup>+</sup>, 347.0395; found, 347.0384.

**Synthesis of N-(4-(6-bromo-1, 3-dioxo-1 H-benzo [de]isoquinolin-2(3H)-yl) butyl) acrylamide (2) and poly-BrNpA. (3)**

**(2):** <sup>1</sup>H NMR (400 MHz, DMSO-d<sub>6</sub>, δ) 8.50 (d, J = 7.2 Hz, 1H, Ar H), 8.47 (d, J = 8.4 Hz, 1H, Ar H), 8.26 (d, J = 7.9 Hz, 1H, Ar H), 8.15 (d, J = 7.9 Hz, 1H, Ar H), 8.09 (s, 1H, NH), 7.94 (s, 1H, Ar H), 6.18 (dd, J = 17.1, 10.1 Hz, 1H, CH), 6.03 (dd, J = 17.1, 2.1 Hz, 1H, CH), 5.54 (dd, J = 10.1, 2.1 Hz, 1H, CH), 4.01 (t, J = 7.1 Hz, 2H, CH<sub>2</sub>), 3.15 (dd, J = 12.7, 6.6 Hz, 2H, CH<sub>2</sub>), 1.70 – 1.59 (m, 2H, CH<sub>2</sub>), 1.50 (dd, J = 14.9, 7.1 Hz, 2H, CH<sub>2</sub>). <sup>13</sup>C NMR (100 MHz, DMSO-d<sub>6</sub>, δ) 164.50, 162.89, 162.84, 132.59, 131.84, 131.58, 131.34, 130.96, 129.75, 129.13, 128.78, 128.24, 124.88, 122.70, 121.92, 38.40, 26.73, 25.21. HRMS (ESI) (m/z): [M+H]<sup>+</sup> calcd for [C<sub>19</sub>H<sub>18</sub>BrN<sub>2</sub>O<sub>3</sub>]<sup>+</sup>, 401.0501; found, 401.0505.

**(3):** <sup>1</sup>H NMR (400 MHz, D<sub>2</sub>O, δ) 8.20-6.91 (m, broad, 5H, aromatic protons), 2.38-2.07 (broad, principal chain protons), 1.82-1.40 (broad, principal chain protons). GPC (H<sub>2</sub>O): Mn (PDI) = 4.6 kDa (6.23).

**Preparation of poly-BrNpA-AuNC@histidine-PAM composite.** The composite was prepared by mixing the PAM (0.14g, Mw=400000-800000), polymer **3** (0.001 g, 0.0025 mmol) and AuNC@histidine (0-1400μl, 8.4mg/ml) in DI water, and then stirring for 15 minutes at room temperature. Adopt a centrifuge method to avoid bubbles. Then rest for 1 hour. Such obtained PAM solution are smeared on glass to prepare PAM films by natural withering.

**Preparation of poly-BrNpA-AuNC@histidine-PVP composite.** The composite was prepared by mixing the PVP (0.14g, Mw=50000-60000), polymer **3** (0.001 g, 0.0025 mmol) and AuNC@histidine (100μl, 8.4mg/ml) in DI water, and then stirring for 15 minutes at room temperature. Adopt a centrifuge method to avoid bubbles. Then rest for 1 hour. Such obtained PVP solution are smeared on glass to prepare PVP films by natural withering.

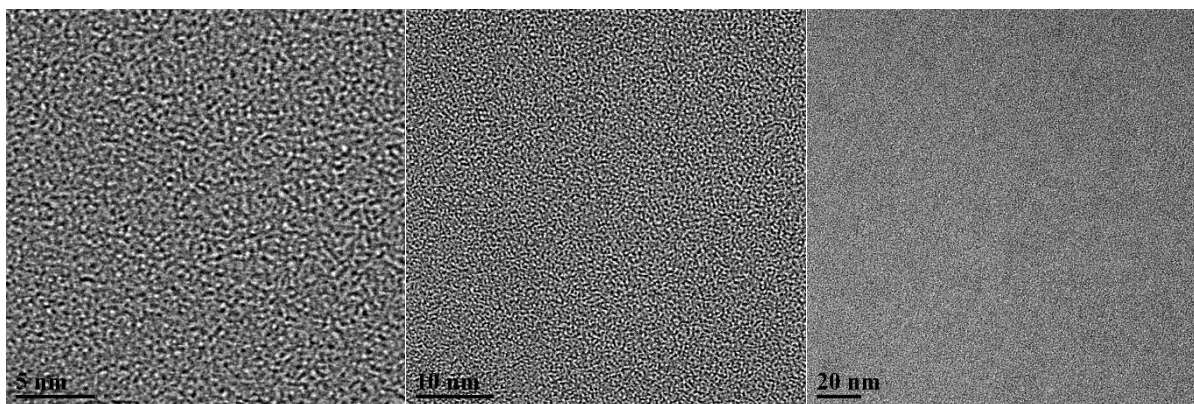

**Figure S2.** The TEM spectra of AuNC@ histidine.

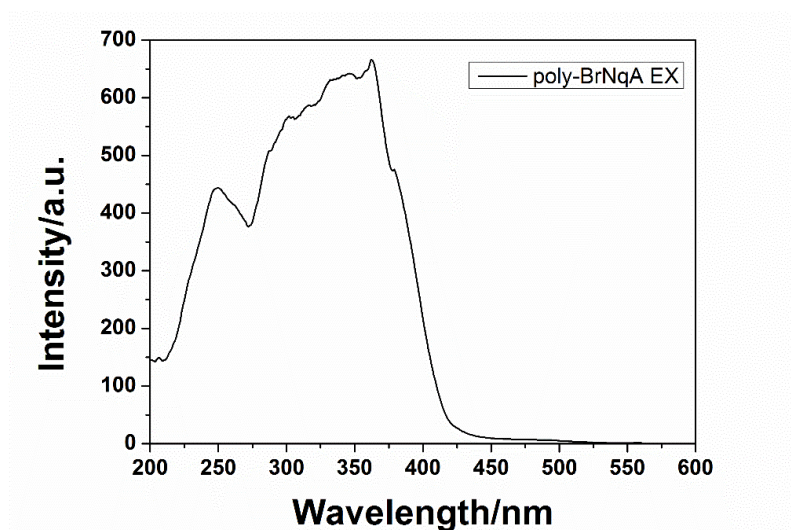

**Figure S3.** The excitation spectrum of poly-BrNpA,  $\lambda_{em}$  =580nm; (phosphorescence mode; excitation slit = 10 nm; emission slit = 10 nm; Measurements were carried out in the amorphous solid state.)

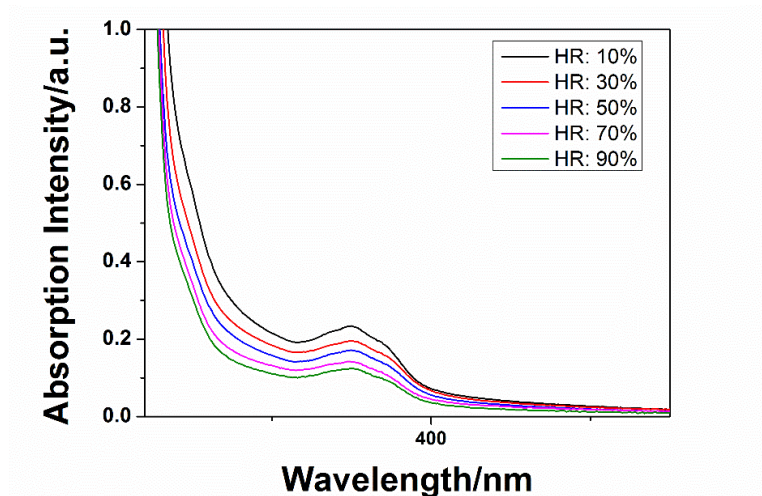

**Figure S4.** The absorption spectrum of poly-BrNpA/AuNC@histidine in different humidity.

**Table S1.** The different mole proportions of triadic system, and calculated CIE coordinates from the PL spectra of the PVA composite films shown in Figure 2(c).

| No | poly-BrNpA /mg | AuNC@histidine/ $\mu$ l | PVA/mg | H <sub>2</sub> O/ $\mu$ l | Ratio a'/b' (w/w) | CIE coordinates  |
|----|----------------|-------------------------|--------|---------------------------|-------------------|------------------|
| 1  | 1              | 0                       | 140    | 1400                      | 1:0               | (0.4415, 0.3784) |
| 2  | 1              | 100                     | 140    | 1300                      | 1:0.84            | (0.3629, 0.3285) |
| 3  | 1              | 200                     | 140    | 1200                      | 1:1.68            | (0.331, 0.32)    |
| 4  | 1              | 300                     | 140    | 1100                      | 1:2.52            | (0.3227, 0.3062) |
| 5  | 1              | 400                     | 140    | 1000                      | 1:3.36            | (0.3001, 0.2931) |
| 6  | 1              | 500                     | 140    | 900                       | 1:4.2             | (0.2875, 0.2975) |
| 7  | 1              | 600                     | 140    | 800                       | 1:5.06            | (0.2785, 0.2895) |
| 8  | 1              | 700                     | 140    | 700                       | 1:5.88            | (0.276, 0.2849)  |
| 9  | 1              | 800                     | 140    | 600                       | 1:6.72            | (0.274, 0.2837)  |
| 10 | 1              | 900                     | 140    | 500                       | 1:7.56            | (0.2707, 0.2783) |
| 11 | 1              | 1000                    | 140    | 400                       | 1:8.4             | (0.2714, 0.2766) |
| 12 | 1              | 1100                    | 140    | 300                       | 1:9.24            | (0.2636, 0.2752) |
| 13 | 1              | 1200                    | 140    | 200                       | 1:10.08           | (0.2646, 0.2728) |
| 14 | 1              | 1300                    | 140    | 100                       | 1:10.92           | (0.2516, 0.2653) |
| 15 | 0              | 1400                    | 140    | 0                         | 0:11.76           | (0.2277, 0.2565) |

**Table S2.** Calculated CIE coordinates from the PL spectra changes under different humidity shown in

Figure 2(e).

| No | humidity | CIE coordinates  |
|----|----------|------------------|
| 1  | 10%      | (0.3961, 0.3296) |
| 2  | 20%      | (0.3698, 0.3163) |
| 3  | 30%      | (0.3639, 0.3116) |
| 4  | 40%      | (0.3336, 0.3101) |
| 5  | 50%      | (0.3136, 0.3074) |
| 6  | 60%      | (0.2992, 0.297)  |
| 7  | 70%      | (0.2885, 0.2941) |
| 8  | 80%      | (0.2725, 0.2868) |
| 9  | 90%      | (0.2541, 0.2814) |

**Table S3.** Hydrogen bonding between the components.

| Polymer | AuNC@ histidine | BrNqA | PAM |
|---------|-----------------|-------|-----|
| PVA     | ✓               | ✓     | ✓   |
| PVP     | ✓               |       | ✓   |
| PAM     | ✓               | ✓     | ✓   |

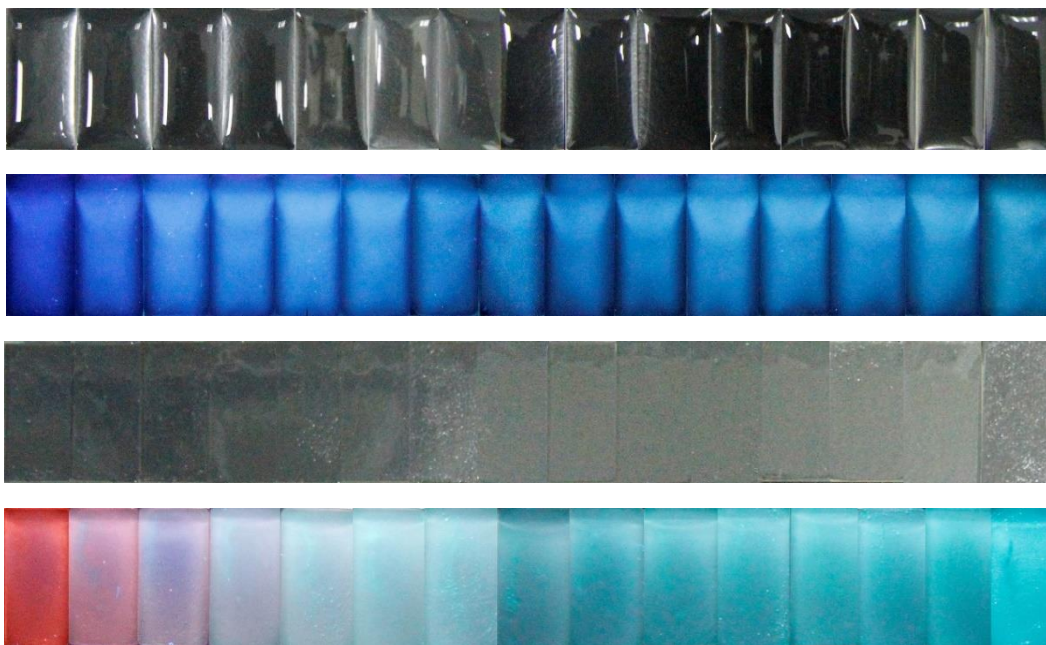

**Figure S5.** The luminescence photos of dual-emission films of different proportions in PVA, conditions as follows: aqueous solution on the quartz plates under daily light, aqueous solution on the quartz plates



under  $\lambda=365$  nm UV irradiation, dry film under daily light, dry film under  $\lambda=365$  nm UV irradiation (from top to down).

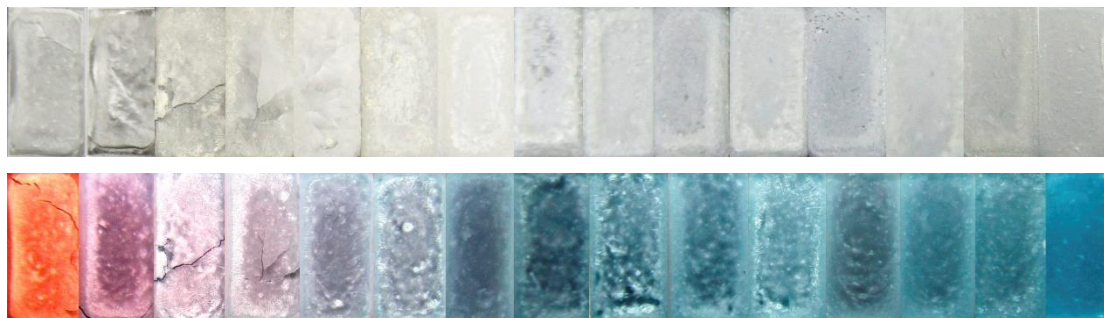

**Figure S6.** The luminescence photos of dual-emission PAM films of different proportions in dry film under daily light (top) and dry film under  $\lambda=365$  nm UV irradiation (down)

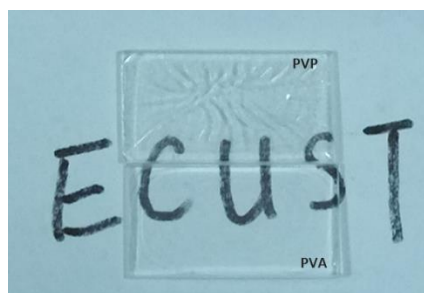

**Figure S7.** The luminescence photos of dual-emission PVP films in dry film under daily light.
